# Supplementary material for: Transcriptional identification and characterization of differentially expressed genes associated with embryogenesis in radish (Raphanus sativus L.)
Source: PubMed Central journal article supplement (PMC4763228; doi:10.1038/srep21652), 2016-02-23
Supplement: srep21652-s1.pdf [file srep21652-s1.pdf]

## **Supplementary information**

### **Transcriptional identification and characterization of differentially expressed genes associated with embryogenesis in radish (*Raphanus sativus* L.)**

Lulu Zhai<sup>1,2</sup>, Liang Xu<sup>1</sup>, Yan Wang<sup>1</sup>, Xianwen Zhu<sup>3</sup>, Haiyang Feng<sup>1</sup>, Chao Li<sup>1</sup>,  
Xiaobo Luo<sup>1</sup>, Muleke Everlyne<sup>1</sup>, Liwang Liu<sup>1,\*</sup>

## 1. Supplementary Figures

**Supplementary Figure S1:** Distribution coverage of DEGs. A: Library 0\_DAP, B: Library 7\_DAP and C: Library 15\_DAP.

**Supplementary Figure S2:** Comparison of gene expression levels among the three libraries based on pairwise comparison. A, B and C showed gene expression level of 0\_DAP vs 7\_DAP, 0\_DAP vs 15\_DAP and 7\_DAP vs 15\_DAP, respectively. With an estimated false-discovery rate (FDR) of  $\leq 0.001$  and  $|\log_2 \text{Ratio}| \geq 1$ , the red shows the proportion of up-regulated genes; the green represents down-regulated genes, and the blue shows the proportion of genes not differentially expressed.

**Supplementary Figure S3:** The related genes involved in pathway of plant hormone signal transduction. The pathway originate from Kyoto Encyclopedia of Genes and Genome data base; A: DEGs between 0\_DAP and 7\_DAP library; B: DEGs between 0\_DAP and 15\_DAP library; C: DEGs between 7\_DAP and 15\_DAP library.

**Supplementary Fig. S4:** Comparison of expression profile by RNA-Seq and RT-qPCR. Comparison of expression profiles of 17 randomly selected genes by RNA-seq and RT-qPCR showing different expression profiles in three comparative groups (0\_DAP\_vs\_7\_DAP, 0\_DAP\_vs\_15\_DAP and 7\_DAP\_vs\_15\_DAP) during embryogenesis. Each data point represent the  $\log_2$  normalized expression level obtained from RNA-seq (y axis) and RT-qPCR (x axis) analyses.

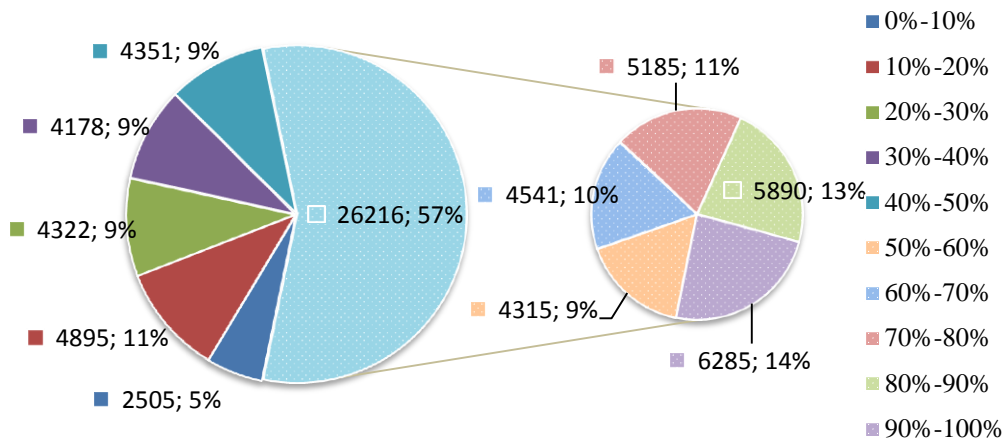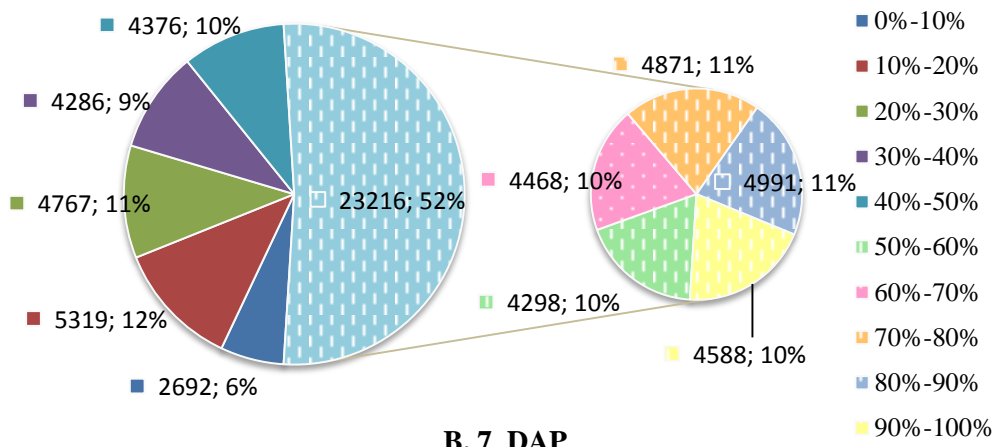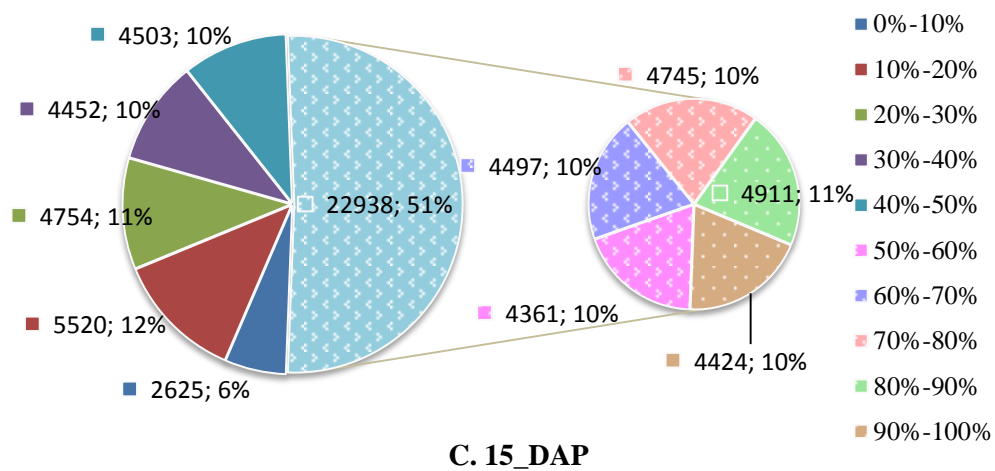

**Supplementary Figure S1:** Distribution coverage of DEGs. A: Library 0\_DAP, B: Library 7\_DAP and C: Library 15\_DAP.

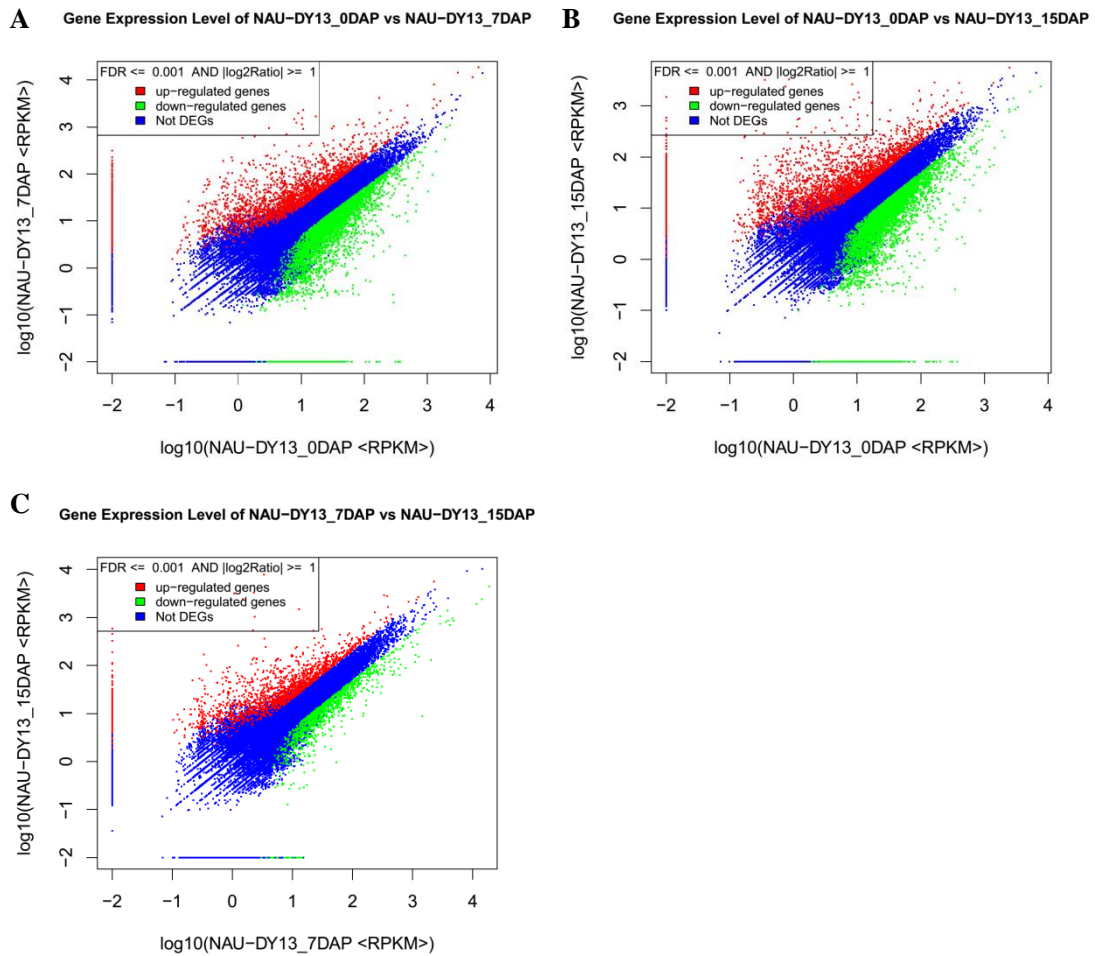

**Supplementary Figure S2:** Comparison of gene expression levels among the three libraries based on pairwise comparison. A, B and C showed gene expression level of 0\_DAP vs 7\_DAP, 0\_DAP vs 15\_DAP and 7\_DAP vs 15\_DAP, respectively. With an estimated false-discovery rate (FDR) of  $\leq 0.001$  and  $|\log_2\text{Ratio}| \geq 1$ , the red shows the proportion of up-regulated genes; the green represents down-regulated genes, and the blue shows the proportion of genes not differentially expressed.

A

PLANT HORMONE SIGNAL TRANSDUCTION

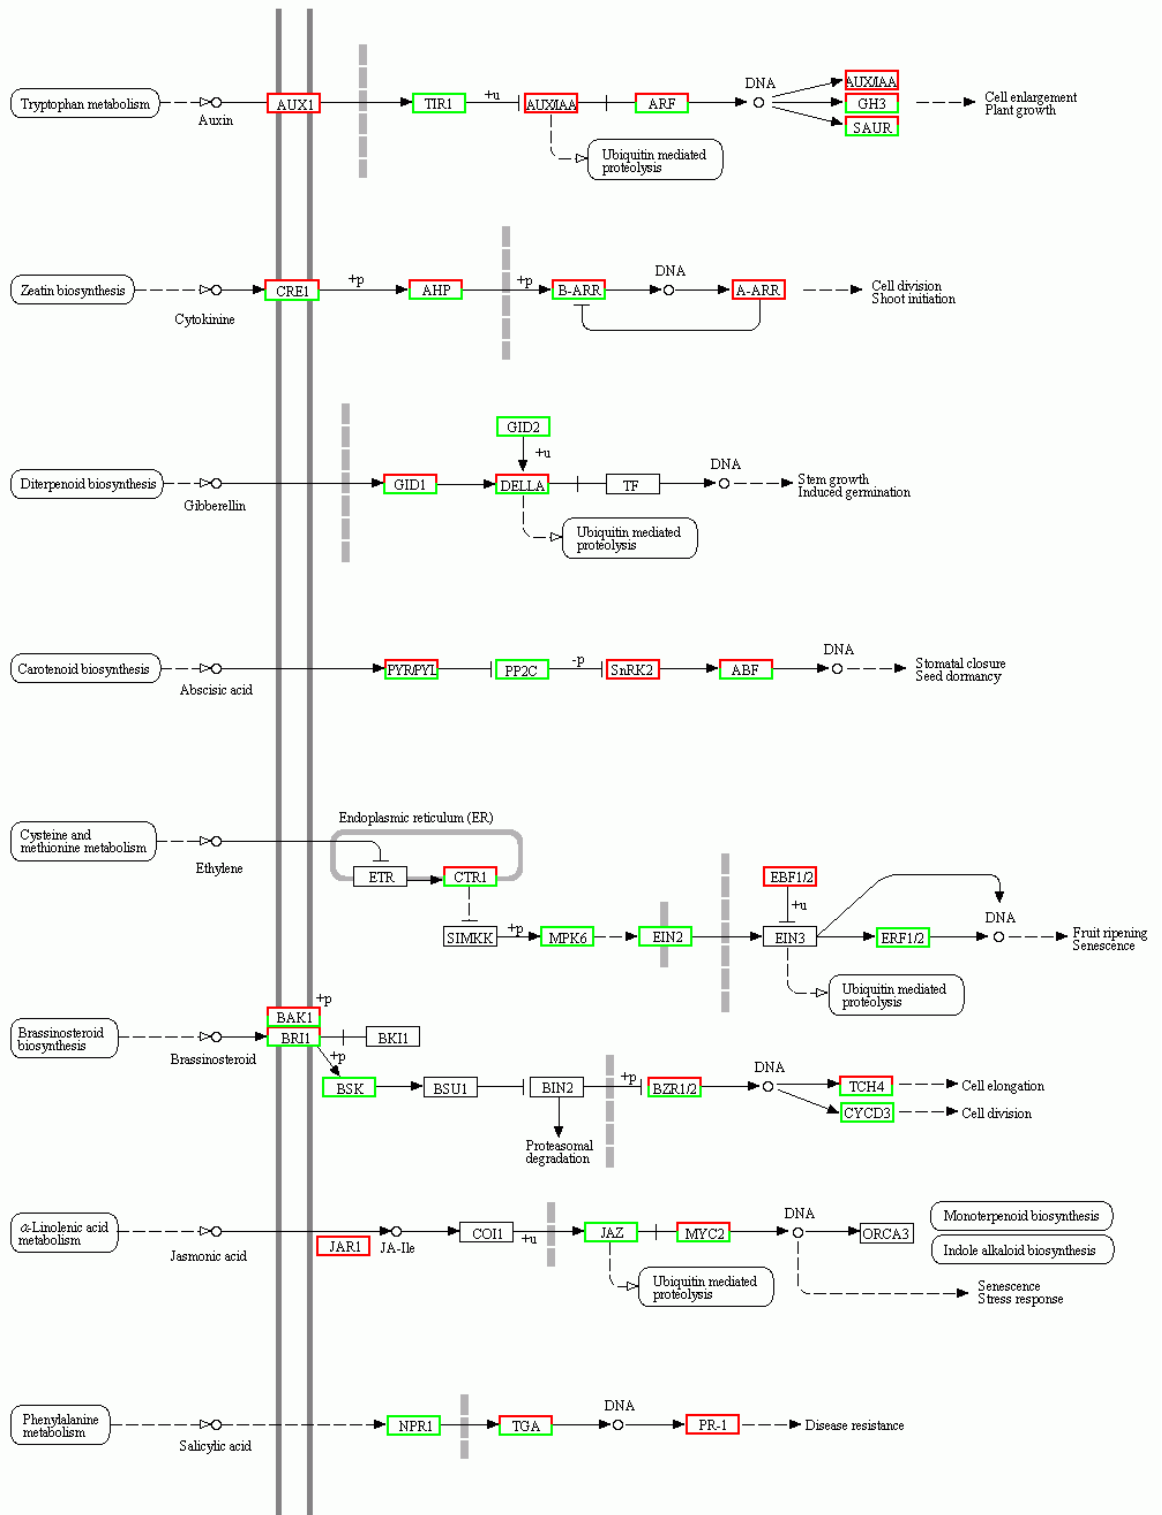

B

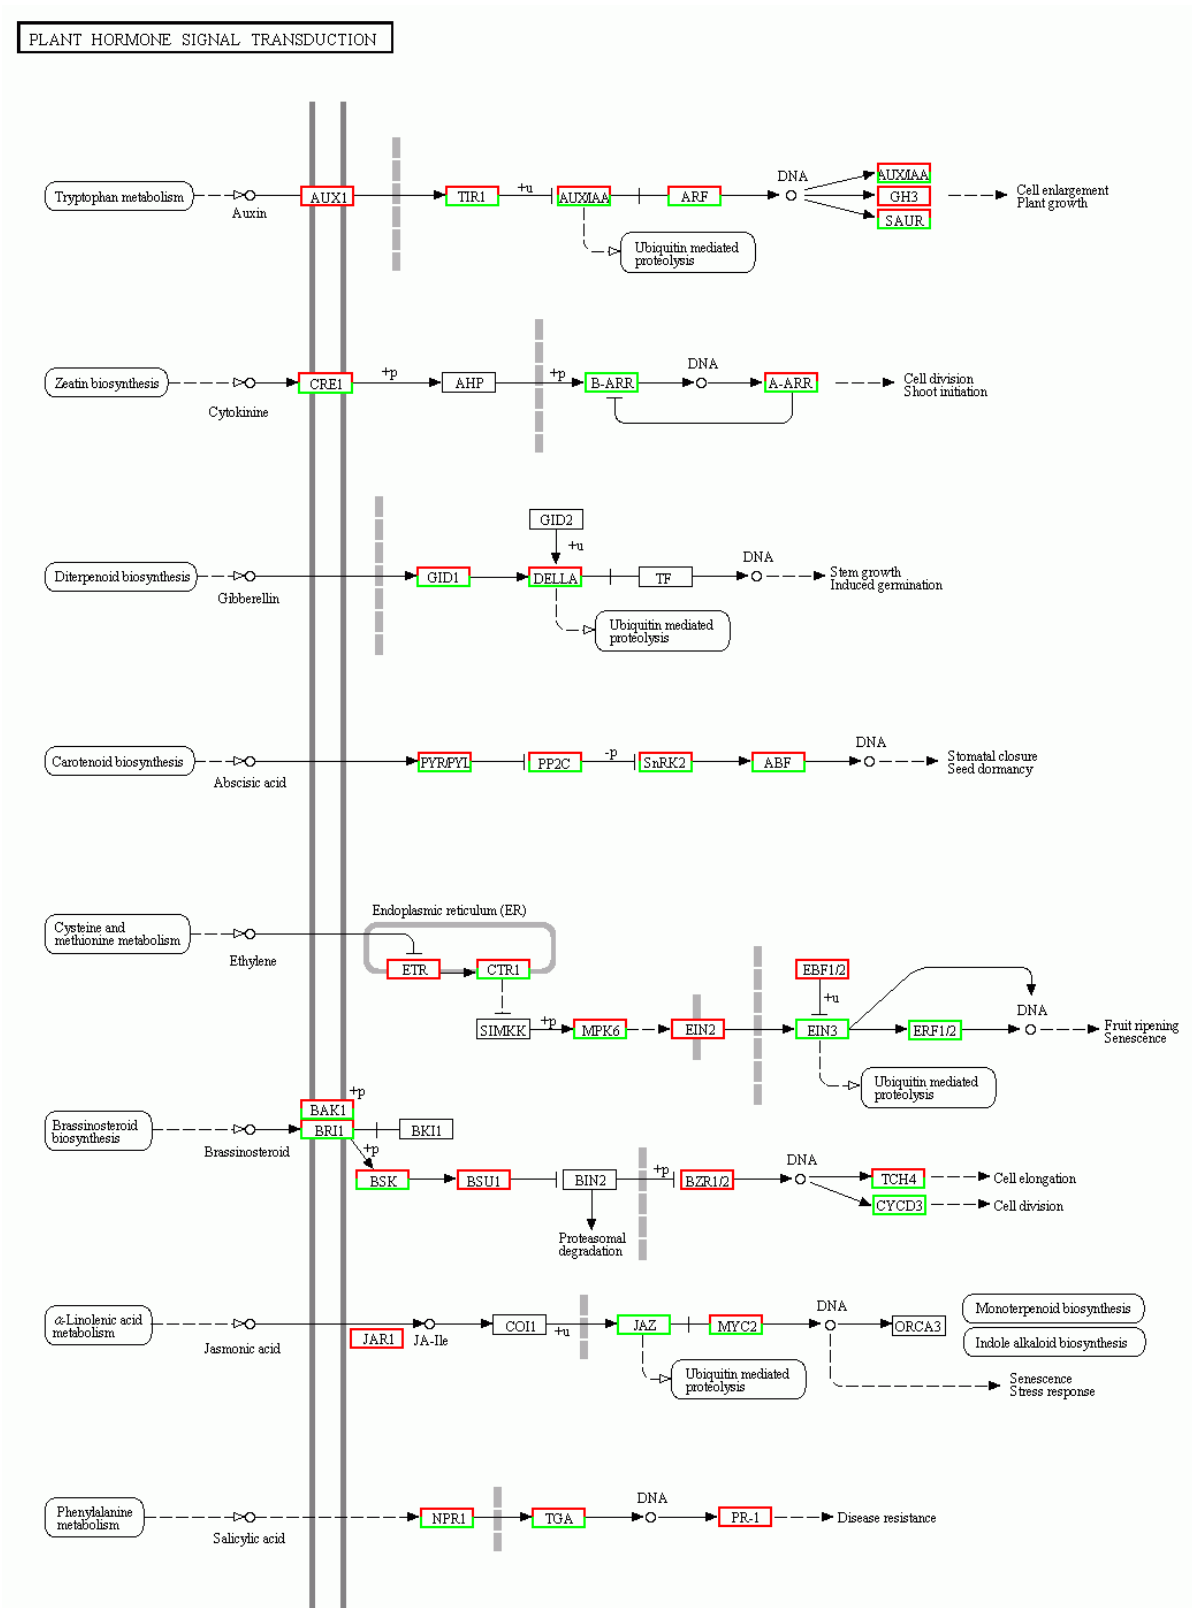

C

PLANT HORMONE SIGNAL TRANSDUCTION

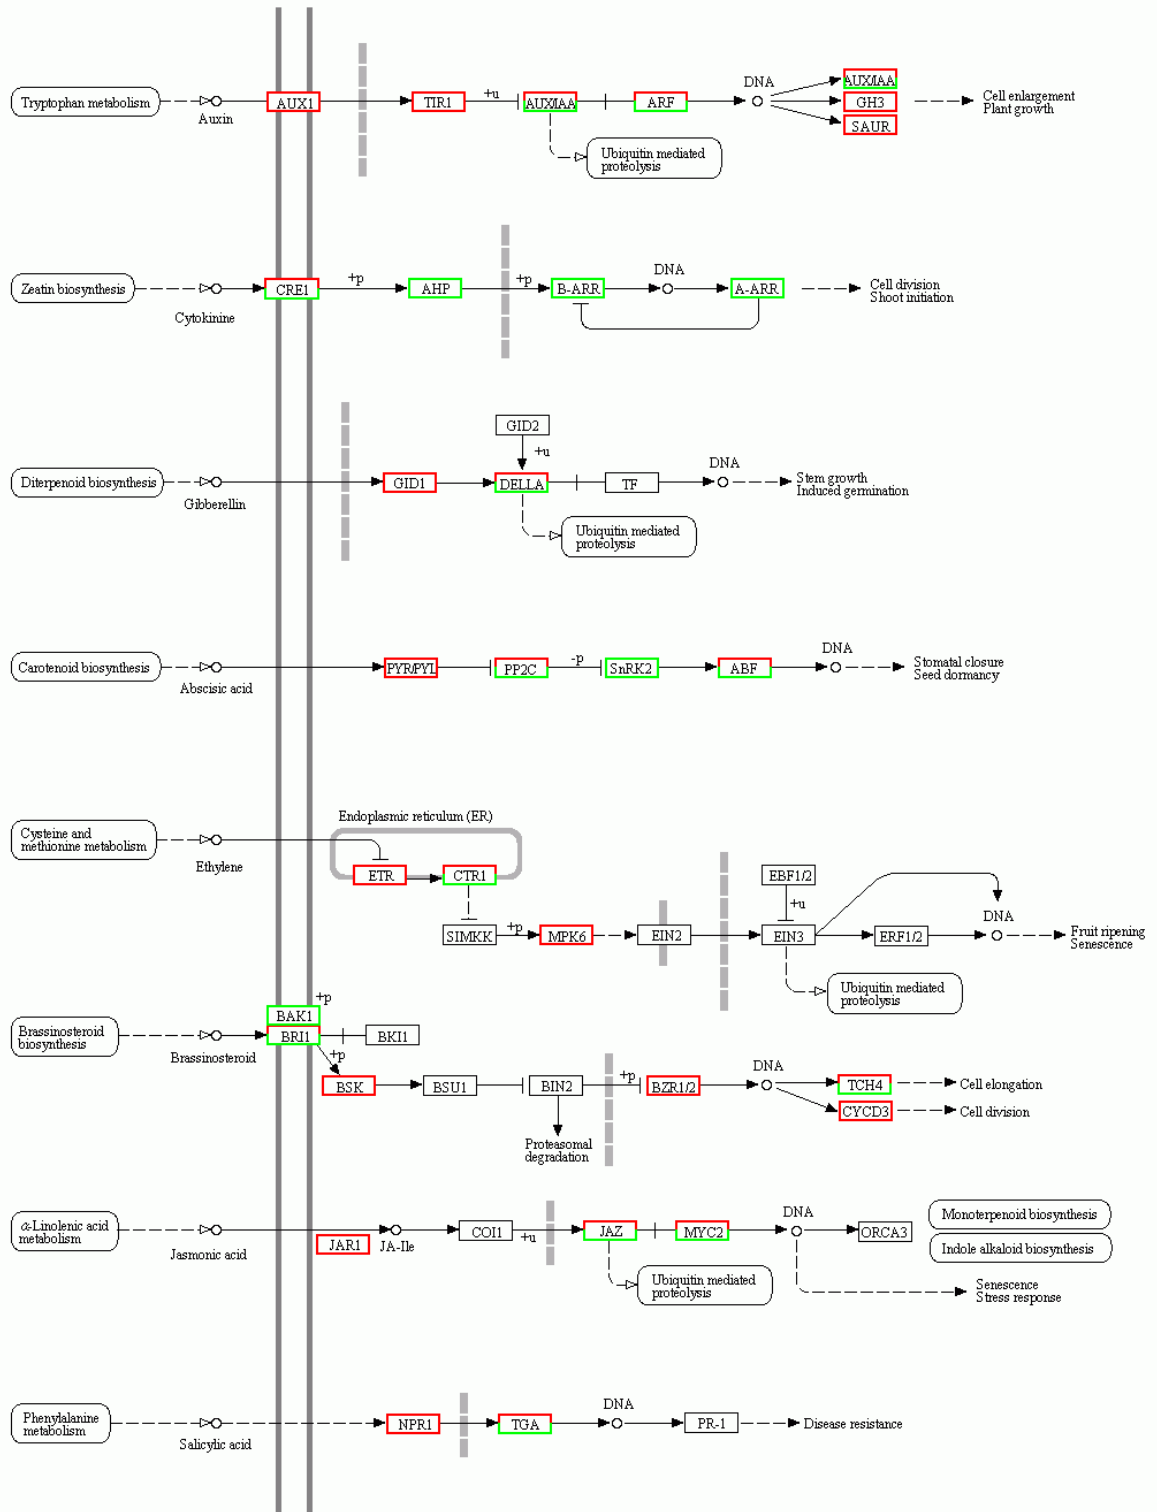

**Supplementary Figure S3:** The related genes involved in pathway of plant hormone signal transduction. The pathway originate from Kyoto Encyclopedia of Genes and Genome data base; A: DEGs between 0\_DAP and 7\_DAP library; B: DEGs between 0\_DAP and 15\_DAP library; C: DEGs between 7\_DAP and 15\_DAP library.

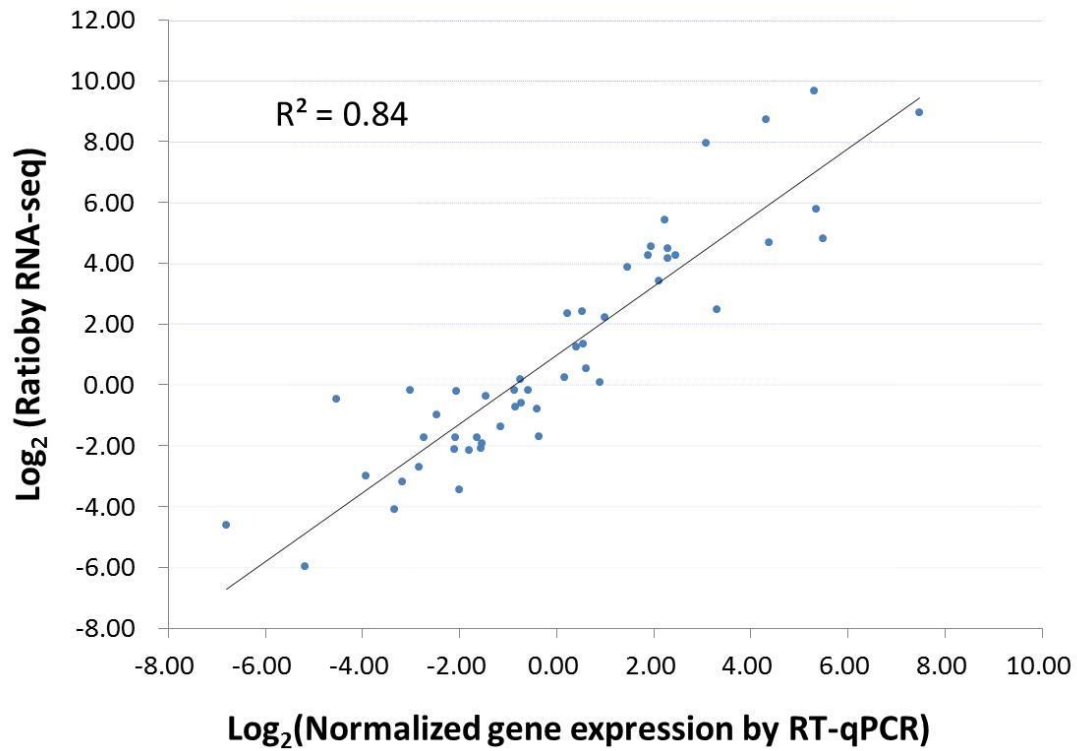

**Supplementary Fig. S4:** Comparison of expression profile by RNA-Seq and RT-qPCR. Comparison of expression profiles of 17 randomly selected genes by RNA-seq and RT-qPCR showing different expression profiles in three comparative groups (0\_DAP\_vs\_7\_DAP, 0\_DAP\_vs\_15\_DAP and 7\_DAP\_vs\_15\_DAP) during embryogenesis. Each data point represent the  $\text{log}_2$  normalized expression level obtained from RNA-seq (y axis) and RT-qPCR (x axis) analyses.



## **2. Supplementary Tables**

**Supplementary Table S1:** The expressed genes with coverage more than 50% (See Excel file).

**Supplementary Table S2:** The up- and down-regulated transcripts based on pairwise comparison among DGE libraries (See Excel file).

**Supplementary Table S3:** The list of DEGs among three cDNA libraries (See Excel file).

**Supplementary Table S4:** GO functional enrichment analysis at early stage of embryogenesis (See Excel file).

**Supplementary Table S5:** KEGG pathways analysis based on pairwise comparison (See Excel file).

**Supplementary Table S6:** The DEGs involved in embryo induction, formation and maturation stages (See Excel file).

**Supplementary Table S7:** Expression profiles of certain interested genes involved during radish embryogenesis (See Excel file).

**Supplementary Table S8:** The correlation analysis between DEGs and miRNAs during radish embryogenesis (See Excel file).

**Supplementary Table S9:** The primers of differentially-regulated genes for RT-qPCR analysis.

**Supplementary Table S9: The primers of differentially-regulated genes for RT-qPCR analysis.**

| Unigene                             | Gene name                               | Abbreviation name | Primer sequence          |                          | Length (bp) |
|-------------------------------------|-----------------------------------------|-------------------|--------------------------|--------------------------|-------------|
|                                     |                                         |                   | Forward sequence (5'-3') | Reverse sequence (5'-3') |             |
| CL11244.Contig1_CKA                 | WRKY transcription factor 22            | WRKY22            | TTTCTCTCTCTGCTTCTTC      | TTCTGGTGGTTACTGTTG       | 123         |
| CL12457.Contig1_CKA                 | efflux carrier of polar auxin transport | ECPAT             | AATGGAGATAGATTGCTGAA     | CTGAGAATGGACTGAACA       | 263         |
| CL14709.Contig1_CKA                 | Fus3-complementing gene 1               | FC1               | ATTTCCTTCTCTCCCTAT       | CTGTTGCTCGTAATGATTC      | 166         |
| CL203.Contig3_CKA                   | auxin response factor 3-1               | ARF3-1            | TGGCTCATCATCATCATC       | TTCATCAACACCTCTTCG       | 182         |
| CL5790.Contig1_CKA                  | WRKY transcription factor 2             | WRKY2             | ACCAACCATTACCAAGAG       | AAACGCTAAACCAGGAAT       | 174         |
| CL6021.Contig2_CKA                  | late embryogenesis abundant             | LEAHRG            | CTTGTCGTAGTGAATGGA       | CATCGCTTAATACTCTATCTC    | 172         |
| CL6154.Contig1_CKA                  | Argonaute/Zwille-like protein 2         | AG/ZLL2           | TCTTCTCCTTCTCCATCA       | TTTCTCTCTCCCGTTTC        | 184         |
| CL6810.Contig1_CKA                  | aintegumenta                            | AIL               | CGGAAGCCTATGATGTAG       | TCGTTGTTGTTGTTGTTG       | 172         |
| CL7947.Contig4_CKA                  | Suppressor of ABI3-5                    | SUA               | GCTCCTCTATTGACATC        | TTATCCTCGTGAACCTTCG      | 283         |
| CL878.Contig7_CKA                   | ferritin                                | FERRITIN          | GACATAACAGACCGAGAG       | CATCATCATCAACAATCACTA    | 186         |
| CL9728.Contig1_CKA                  | Class I glutamine amidotransferase      | GAT               | TGGTGGTTGCTAATGATAA      | GAGAGTCCTTGTTGTTGT       | 292         |
| gi 166138539 gb FD570215.1          | AGL9                                    | AGL9              | TGAAGATGATAGAGAACAAGAT   | GAGAAGATGATGAGAGCAA      | 124         |
| gi 166144826 gb FD576744.1          | F-box/LRR-repeat protein                | FBXL              | TCTCAACTTCTCCGATTATC     | ACACCTTACCAACATCATT      | 200         |
| gi 167442117 gb FD948074.1 FD948074 | auxin efflux carrier family protein     | EIR               | CAGTTGGTGCGATTATTG       | CGATGATTGGGAGAAGTAT      | 243         |
| gi 167451596 gb FD956186.1 FD956186 | baby boom interacting protein 2         | BIP2              | GTTCTTCTTCAGGCTGTA       | TTCATCGTATTCCGTGTG       | 104         |
| gi 332783910 gb FY434046.1          | ARF8-1                                  | ARF8-1            | TGGACAAGGAGGATGATA       | AGATAACACAAGGGAAACA      | 212         |
| gnl UG Rsa#S42001404                | Small auxin up RNA protein              | SAUR              | GAACGGACATCATCTCTC       | AATCAGTAGCAACGACAA       | 270         |
| gnl UG Rsa#S42026394                | Late embryogenesis abundant             | LEA               | CTAACCGCTATGCCATAA       | GAATCCTTACTCTCAATCCA     | 165         |
| gnl UG Rsa#S42049349                | Late embryogenesis abundant protein     | LEA               | TAAGCACAAGGATGAACA       | AACCACTATGAACCAGAAA      | 276         |
| gnl UG Rsa#S43005757                | Auxin responsive like protein           | ARL               | GTGGTAAGAGAAGGTAAGG      | ATCAGTTTGGGAGCATT        | 170         |

**Supplementary Table S9: The primers of differentially-regulated genes for RT-qPCR analysis. (Continue)**

| Unigene              | Gene name                                  | Abbreviation name | Primer sequence          |                          | Length (bp) |
|----------------------|--------------------------------------------|-------------------|--------------------------|--------------------------|-------------|
|                      |                                            |                   | Forward sequence (5'-3') | Reverse sequence (5'-3') |             |
| gnl UG Rsa#S43013377 | Glutathione S-transferase                  | GST               | TACTTGGTGGGATGAAAC       | CCTGACGAACTCTTAACA       | 299         |
| Unigene13496_CKA     | SAUR-like auxin-responsive protein         | SAUR              | GATGATGATGATGAAGAAGATT   | TTCCATATAAACCTCCACAA     | 170         |
| Unigene18591_CKA     | Zwille-like protein 2                      | ZLL2              | ATCCCTCAAACAACCATT       | ATCATAACAGCGAACTCTT      | 185         |
| Unigene1912_CKA      | glutamate decarboxylase 1                  | GAD1              | GTCGGATAAGTTGGTAGTAT     | AAGTGGAGGATTCATAGC       | 266         |
| Unigene21980_CKA     | Probable LRR receptor-like                 | LRR-STK           | GATACTGTAGGCTCTGAAG      | GTTCCCTTGACCTTTCCTC      | 149         |
| Unigene23299_CKA     | Argonaute-like protein                     | AGL               | CGAGACACAGTTCAAGAA       | ATGCGTTATCACCGTATC       | 196         |
| Unigene25317_CKA     | Leucine-rich repeat-containing             | LRRC              | ATCTTCATCCACTACCTCT      | CCAGCGTTCTTCTTCTTA       | 164         |
| Unigene25469_CKA     | Glutamine synthetase cytosolic isozyme 1-4 | GS1-4             | CAGGCTTGGATATGAGAA       | GCTTGAGGGTATATGATGA      | 142         |
| Unigene27378_CKA     | Nuclear factor Y                           | NF-Y              | AACGGAAGAAGAAGAAGAA      | TGGTGAGGTGTAGAAGAT       | 167         |
| Unigene28056_CKA     | CHD3-type chromatin-remodeling             | PKL               | AGCACAGAATAACCAGAAT      | CCATAATAATCCTCCGCATA     | 192         |
| Unigene31774_CKA     | embryonic flower 2_2                       | EMF2_2            | GCATCTCTTCCTCTTCAC       | ATCTTCAGTTACTTCAGTCTT    | 110         |
| Unigene4179_CKA      | Leafy cotyledon 1                          | LEC1-2            | CAGGTAGTGGTCTTGTTTC      | TCTTGATACGCTTCTTAATAC    | 195         |
| Unigene446_CKA       | Embryo sac development arrest 7            | EDA7              | CTTCCTCTGACAACATCC       | CTTCCACAACGGTAGAT        | 262         |
